# Supplementary material
Source: PubMed Central journal article supplement (PMC3282919)

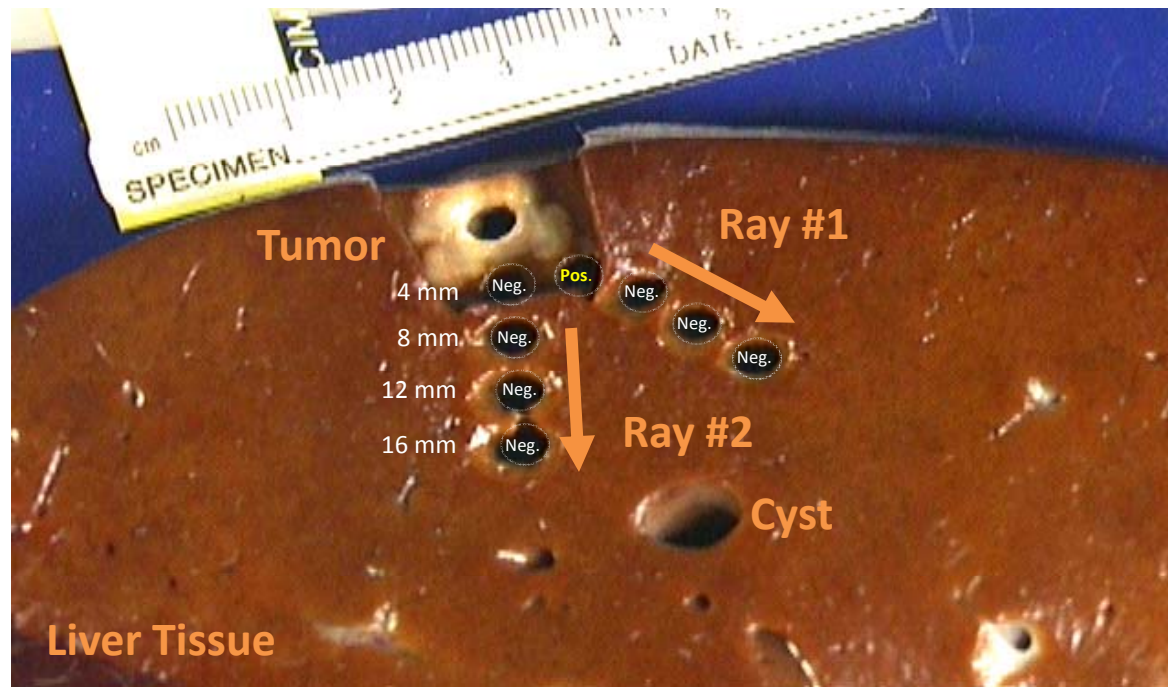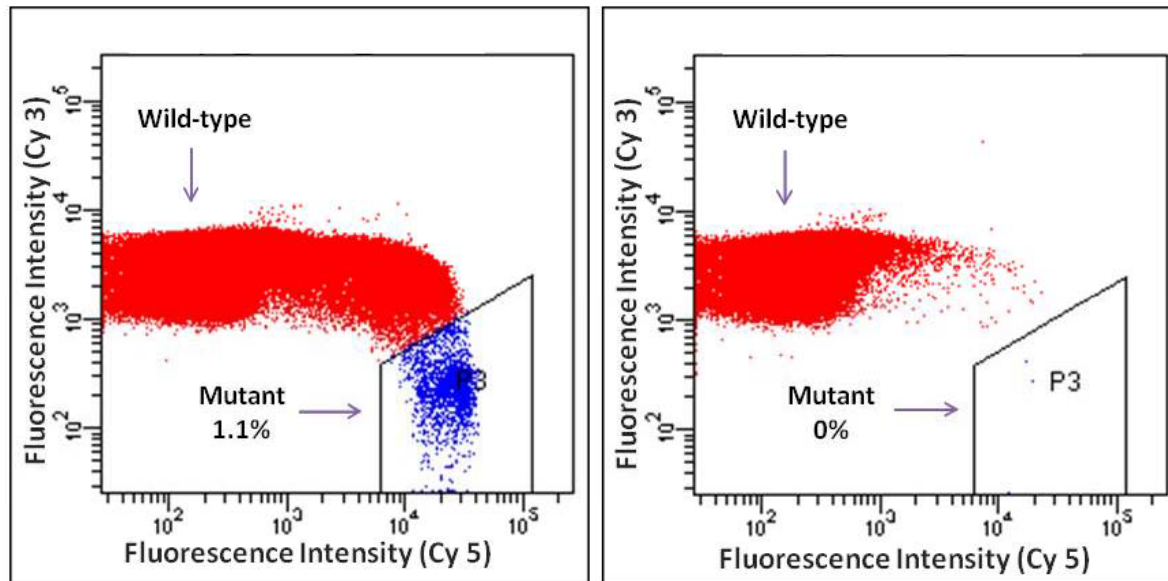

FIGURE 1

Supplement: NIHMS288509-supplement-2.pdf [file NIHMS288509-supplement-2.pdf]
